# Supplementary material for: SIN3B promotes integrin αV subunit gene transcription and cell migration of hepatocellular carcinoma
Source: PubMed Central journal article supplement — J Mol Cell Biol. 2018 Sep 12;11(5):421–32. doi: 10.1093/jmcb/mjy050 (PMC7727265; doi:10.1093/jmcb/mjy050), 2018-09-12
Supplement: mjy050_supplementary_material.pdf [file mjy050_supplementary_material.pdf]

## Supplementary Figures

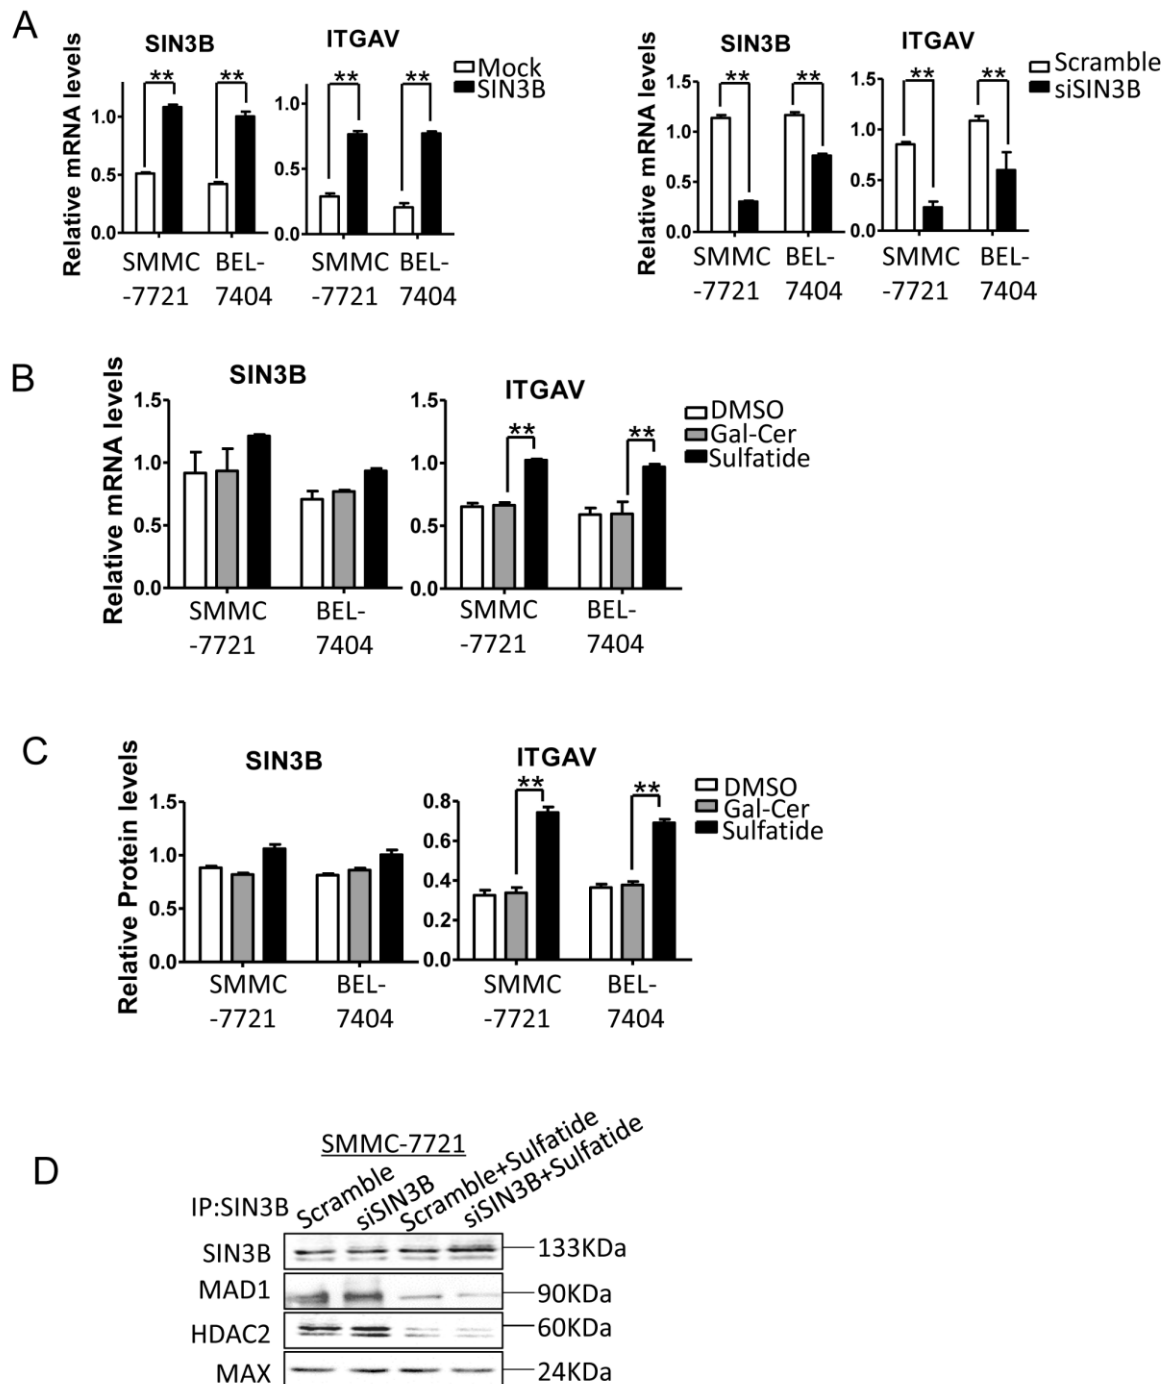

Supplementary Figure S1. Sulfatide regulated integrin  $\alpha$  V (ITGAV) expression in hepatocellular carcinoma cells.

(A) ITGAV and SIN3B expressions in SIN3B overexpression or knockdown HCC cells were determined by RT-PCR and data were quantitatively analyzed.

(B) Quantitative analysis of RT-PCR data of ITGAV and SIN3B expressions in HCC cells treated with sulfatide 24 hours.

(C) Quantitative analysis of western blot data of ITGAV and SIN3B expressions in HCC cells treated with sulfatide 48 hours.

(D) In SIN3B knockdown and control cells, the influence of sulfatide on the binding of SIN3B to MAD1 and HDAC2 was assayed by immunoprecipitation. Co-Immunoprecipitated (IP) complex was detected by western blot in SIN3B knockdown cells, in the presence or absence of sulfatide, with corresponding antibody (SIN3B, MAX, MAD1 or HDAC2).

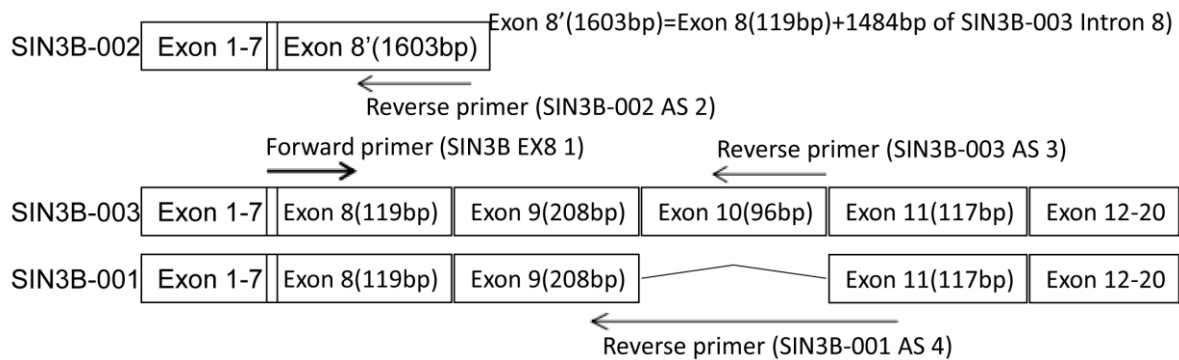

Supplementary Figure S2. Design of specific primers for SIN3B transcript variants.

Schematic diagram of the three major SIN3B transcript variants and the specific primers.
